# Supplementary material for: ZnO/Ag porous nanosheets used as substrate for surface-enhanced Raman scattering to detect organic pollutant
Source: Royal Society of Chemistry journal article supplement (doi:10.1039/c5ra06735a), 2015-01-01
Supplement: c5ra06735a1.pdf [file c5ra06735a1.pdf]

## **Supporting Information**

### **ZnO/Ag porous Nanosheets used as Substrate for Surface-enhanced Raman Scattering to detect organic pollutant**

Kunyu Zhao<sup>†</sup>, Jie Lin<sup>†</sup> and Lin Guo<sup>\*</sup>

School of Chemistry and Environment, Beihang University, Beijing  
100191, PR China

<sup>\*</sup> E-mail: guolin@buaa.edu.cn; Tel.: +86-10-82338162.

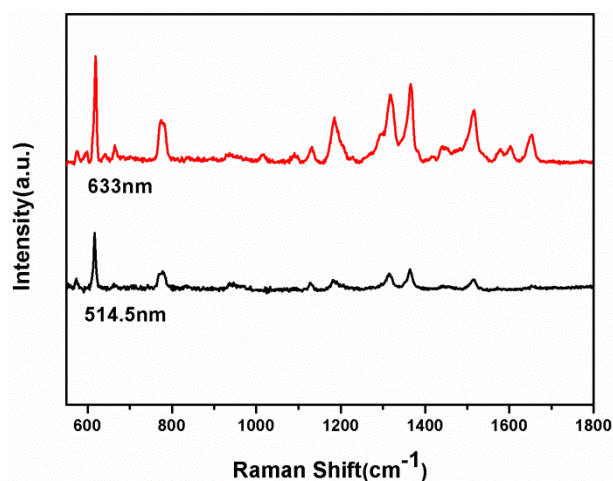

**Fig. S1** The SERS spectra of R6G detected by ZnO/Ag nanocomposite in the 514.5 nm(black) and 633 nm(red)

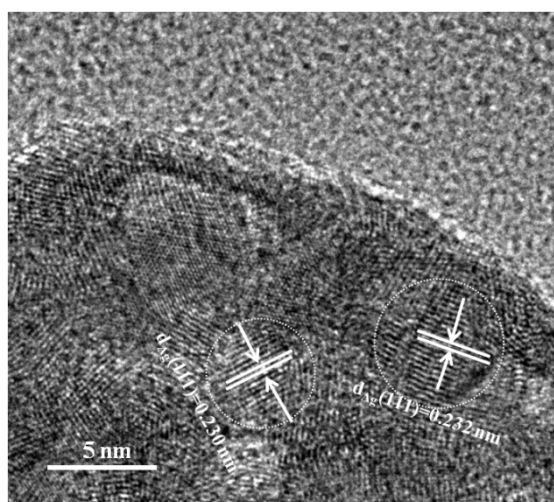

**Fig. S2** HRTEM image of the ZnO/Ag hybrid nanosheets.

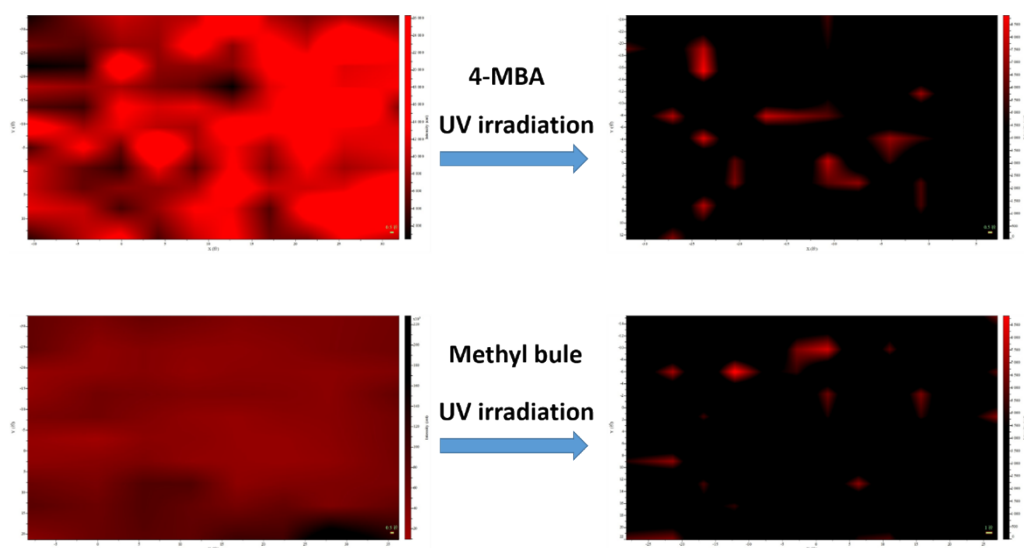

**Fig. S3 In situ recycling SERS mapping of the ZnO – Ag substrate absorbed by 4-MBA (the peak mapped is  $1586\text{ cm}^{-1}$ ) and Methyl blue (the peak mapped is  $1620\text{ cm}^{-1}$ ). Laser wavelength: 647 nm; power: 10mw; lens: 50 X long objective; acquisition time: 5 s.**
